# Supplementary material for: A Pangenome Approach for Discerning Species-Unique Gene Markers for Identifications of Streptococcus pneumoniae and Streptococcus pseudopneumoniae
Source: PubMed Central journal article supplement (PMC7248185; doi:10.3389/fcimb.2020.00222), 2020-05-19
Supplement: Data_Sheet_1.pdf [file Data_Sheet_1.pdf]

**Supplementary Figure S1.** Phylogenetic tree of pair-wise genomic Average Nucleotide Identity (ANI) similarities based on the BLAST algorithm (ANiB) using the JspeciesWS between all genome sequences of 32 closed genomes of *S. pneumoniae*, 36 *S. pseudopneumoniae* and 65 *S. mitis*, as well as the type strain of, *S. infantis*, *S. oralis*, *S. oralis* subsp. *tigurinus* and *S. oralis* subsp. *dentisani*.

**Supplementary Figure S2.** Distribution of *S. pseudopneumoniae* gene markers on 29 clinical strains classified as *S. pseudopneumoniae*.

## Supplementary information

### Materials and methods

#### PCR-amplification

For amplification of the unique genes for both *S. pneumoniae* and *S. pseudopneumoniae*, the reaction mixture for PCR-assays included 0.1 to 10 ng of DNA template, 1X GoTaq Green Master mix (Promega Corporation, Madison, WI, USA), 1  $\mu$ M concentration of each amplification-primer, in a total volume of 25  $\mu$ L. The PCR conditions were as follows: initial denaturation at 95 °C for 5 min; followed by 30 cycles of denaturation at 95 °C for 30 sec, primer-annealing at 55 °C for 30 sec, and primer-extension at 72 °C for 90 sec; and a final elongation-period at 72°C for 5 min. PCR-products were resolved by electrophoresis in 1% agarose gels at 70 V for 20 min and stained afterwards with GelRed<sup>TM</sup> (Biotium, Hayward, CA, USA).

#### Optochin testing

Bacterial cell suspensions, with MacFarland 0.5 standardized turbidity, were prepared and inoculated onto Mueller-Hinton agar supplemented with 5% defibrinated horse blood (MH-F agar) (Substrate Division, Clinical Microbiological Laboratory, Sahlgrenska University Hospital, Gothenburg, Sweden). A disc of optochin (5  $\mu$ g) (Oxoid) was added to each plate. Both plates were incubated overnight, one at 36 °C with 5% CO<sub>2</sub> and the other one at 37 °C in aerobic conditions. Sensitivity zones less than or equal to 14 mm were considered to indicate resistance to optochin. *S. pneumoniae* CCUG 28588<sup>T</sup> and *S. pseudopneumoniae* CCUG 49455<sup>T</sup> were used as controls.
