# Supplementary material for: A Pangenome Approach for Discerning Species-Unique Gene Markers for Identifications of Streptococcus pneumoniae and Streptococcus pseudopneumoniae
Source: PubMed Central journal article supplement (PMC7248185; doi:10.3389/fcimb.2020.00222), 2020-05-19
Supplement: Table_1.pdf [file Table_1.pdf]

**Supplementary Table S1.** List of genome sequences included in the pangenome analyses.

| Strain              | Accession number | GenBank species designation | Cluster analysis ANIb      | Size (Mb) | Level    | Pangenome analysis |
|---------------------|------------------|-----------------------------|----------------------------|-----------|----------|--------------------|
| 70585               | CP000918         | <i>S. pneumoniae</i>        | <i>S. pneumoniae</i>       | 2.2       | Complete | Yes                |
| 670-6B              | CP002176         | <i>S. pneumoniae</i>        | <i>S. pneumoniae</i>       | 2.2       | Complete | Yes                |
| A66                 | LN847353         | <i>S. pneumoniae</i>        | <i>S. pneumoniae</i>       | 2.0       | Complete | Yes                |
| AP200               | CP002121         | <i>S. pneumoniae</i>        | <i>S. pneumoniae</i>       | 2.1       | Complete | Yes                |
| ATCC 700669         | FM211187         | <i>S. pneumoniae</i>        | <i>S. pneumoniae</i>       | 2.2       | Complete | Yes                |
| CGSP14              | CP001033         | <i>S. pneumoniae</i>        | <i>S. pneumoniae</i>       | 2.2       | Complete | Yes                |
| D39                 | CP000410         | <i>S. pneumoniae</i>        | <i>S. pneumoniae</i>       | 2.0       | Complete | Yes                |
| G54                 | NC_011072        | <i>S. pneumoniae</i>        | <i>S. pneumoniae</i>       | 2.1       | Complete | Yes                |
| gamPNI0373          | CP001845         | <i>S. pneumoniae</i>        | <i>S. pneumoniae</i>       | 2.1       | Complete | Yes                |
| Hungary19A-6        | CP000936         | <i>S. pneumoniae</i>        | <i>S. pneumoniae</i>       | 2.2       | Complete | Yes                |
| INV104              | FQ312030         | <i>S. pneumoniae</i>        | <i>S. pneumoniae</i>       | 2.1       | Complete | Yes                |
| INV200              | FQ312029         | <i>S. pneumoniae</i>        | <i>S. pneumoniae</i>       | 2.1       | Complete | Yes                |
| JJA                 | CP000919         | <i>S. pneumoniae</i>        | <i>S. pneumoniae</i>       | 2.1       | Complete | Yes                |
| NCTC 7465           | LN831051         | <i>S. pneumoniae</i>        | <i>S. pneumoniae</i>       | 2.1       | Complete | Yes                |
| NT_110_58           | CP007593         | <i>S. pneumoniae</i>        | <i>S. pneumoniae</i>       | 2.3       | Complete | Yes                |
| OXC141              | FQ312027         | <i>S. pneumoniae</i>        | <i>S. pneumoniae</i>       | 2.0       | Complete | Yes                |
| P1031               | CP000920         | <i>S. pneumoniae</i>        | <i>S. pneumoniae</i>       | 2.1       | Complete | Yes                |
| R6                  | AE007317         | <i>S. pneumoniae</i>        | <i>S. pneumoniae</i>       | 2.0       | Complete | Yes                |
| SNP034156           | FQ312045         | <i>S. pneumoniae</i>        | <i>S. pneumoniae</i>       | 2.0       | Complete | Yes                |
| SNP034183           | FQ312043         | <i>S. pneumoniae</i>        | <i>S. pneumoniae</i>       | 2.0       | Complete | Yes                |
| SNP994038           | FQ312042         | <i>S. pneumoniae</i>        | <i>S. pneumoniae</i>       | 2.0       | Complete | Yes                |
| SNP994039           | FQ312044         | <i>S. pneumoniae</i>        | <i>S. pneumoniae</i>       | 2.0       | Complete | Yes                |
| SP49                | CP018136         | <i>S. pneumoniae</i>        | <i>S. pneumoniae</i>       | 2.2       | Complete | Yes                |
| SP61                | CP018137         | <i>S. pneumoniae</i>        | <i>S. pneumoniae</i>       | 2.1       | Complete | Yes                |
| SP64                | CP018138         | <i>S. pneumoniae</i>        | <i>S. pneumoniae</i>       | 2.1       | Complete | Yes                |
| SPN032672           | FQ312039         | <i>S. pneumoniae</i>        | <i>S. pneumoniae</i>       | 2.1       | Complete | Yes                |
| SPN033038           | FQ312041         | <i>S. pneumoniae</i>        | <i>S. pneumoniae</i>       | 2.1       | Complete | Yes                |
| SPNA45              | HE983624         | <i>S. pneumoniae</i>        | <i>S. pneumoniae</i>       | 2.1       | Complete | Yes                |
| ST556               | CP003357         | <i>S. pneumoniae</i>        | <i>S. pneumoniae</i>       | 2.2       | Complete | Yes                |
| SWU02               | CP018347         | <i>S. pneumoniae</i>        | <i>S. pneumoniae</i>       | 2.1       | Complete | Yes                |
| Taiwan19F-14        | CP000921         | <i>S. pneumoniae</i>        | <i>S. pneumoniae</i>       | 2.1       | Complete | Yes                |
| TCH8431/19A         | CP001993         | <i>S. pneumoniae</i>        | <i>S. pneumoniae</i>       | 2.1       | Complete | Yes                |
| TIGR4; ATCC BAA-334 | AE005672         | <i>S. pneumoniae</i>        | <i>S. pneumoniae</i>       | 2.2       | Complete | Yes                |
| 1321                | AYRP00000000     | <i>S. pseudopneumoniae</i>  | <i>S. pseudopneumoniae</i> | 2.1       | Contig   | Yes                |
| 5247                | AYRQ00000000     | <i>S. pseudopneumoniae</i>  | <i>S. pseudopneumoniae</i> | 2.1       | Contig   | Yes                |
| 22725               | AYRO00000000     | <i>S. pseudopneumoniae</i>  | <i>S. pseudopneumoniae</i> | 2.2       | Contig   | Yes                |
| 1172_SPSE           | JWAJ00000000     | <i>S. pseudopneumoniae</i>  | <i>S. infantis</i>         | 2.0       | Contig   | No                 |
| 1213_SPSE           | JVYO00000000     | <i>S. pseudopneumoniae</i>  | <i>S. mitis</i>            | 2.0       | Contig   | No                 |
| 126_SPSE            | JVWP00000000     | <i>S. pseudopneumoniae</i>  | <i>S. oralis</i>           | 2.1       | Scaffold | No                 |
| 1271.rep1_SPSE      | JVWC00000000     | <i>S. pseudopneumoniae</i>  | <i>S. mitis</i>            | 2.1       | Scaffold | Yes                |
| 1271.rep2_SPSE      | JVWB00000000     | <i>S. pseudopneumoniae</i>  | <i>S. mitis</i>            | 2.1       | Contig   | No                 |
| 1272_SPSE           | JVWA00000000     | <i>S. pseudopneumoniae</i>  | <i>S. mitis</i>            | 2.1       | Scaffold | No                 |
| 144_SPSE            | JVSM00000000     | <i>S. pseudopneumoniae</i>  | <i>S. mitis</i>            | 1.8       | Contig   | Yes                |

|              |              |                            |                            |     |          |     |
|--------------|--------------|----------------------------|----------------------------|-----|----------|-----|
| 163_SPSE     | JVRR00000000 | <i>S. pseudopneumoniae</i> | <i>S. mitis</i>            | 2.1 | Scaffold | No  |
| 205_SPSE     | JVQA00000000 | <i>S. pseudopneumoniae</i> | <i>S. mitis</i>            | 1.9 | Scaffold | No  |
| 276-03       | LJHJ00000000 | <i>S. pseudopneumoniae</i> | <i>S. pseudopneumoniae</i> | 2.2 | Contig   | Yes |
| 277_SPSE     | JVNG00000000 | <i>S. pseudopneumoniae</i> | <i>S. mitis</i>            | 2.2 | Scaffold | No  |
| 289_SPSE     | JVMU00000000 | <i>S. pseudopneumoniae</i> | <i>S. mitis</i>            | 2.1 | Scaffold | Yes |
| 294_SPSE     | JVMO00000000 | <i>S. pseudopneumoniae</i> | <i>S. mitis</i>            | 2.0 | Scaffold | No  |
| 315_SPSE     | JVLX00000000 | <i>S. pseudopneumoniae</i> | <i>S. mitis</i>            | 1.9 | Scaffold | No  |
| 330_SPSE     | AFBD00000000 | <i>S. pseudopneumoniae</i> | <i>S. mitis</i>            | 2.2 | Contig   | Yes |
| 338-14       | LJHI00000000 | <i>S. pseudopneumoniae</i> | <i>S. pseudopneumoniae</i> | 2.2 | Contig   | Yes |
| 342_SPSE     | JVKV00000000 | <i>S. pseudopneumoniae</i> | <i>S. infantis</i>         | 1.9 | Contig   | No  |
| 380_SPSE     | JVJI00000000 | <i>S. pseudopneumoniae</i> | <i>S. mitis</i>            | 2.1 | Contig   | No  |
| 434_SPSE     | JVHE00000000 | <i>S. pseudopneumoniae</i> | <i>S. infantis</i>         | 2.1 | Scaffold | No  |
| 445_SPSE     | JVGV00000000 | <i>S. pseudopneumoniae</i> | <i>S. mitis</i>            | 2.1 | Scaffold | Yes |
| 469_SPSE     | JVJV00000000 | <i>S. pseudopneumoniae</i> | <i>S. infantis</i>         | 2.1 | Scaffold | No  |
| 61-14        | LJHK00000000 | <i>S. pseudopneumoniae</i> | <i>S. pseudopneumoniae</i> | 2.3 | Contig   | Yes |
| 74_SPSE      | JUUZ00000000 | <i>S. pseudopneumoniae</i> | <i>S. infantis</i>         | 1.8 | Contig   | No  |
| 75_SPSE      | JUUO00000000 | <i>S. pseudopneumoniae</i> | <i>S. mitis</i>            | 2.1 | Scaffold | No  |
| 843_SPSE     | JUQX00000000 | <i>S. pseudopneumoniae</i> | <i>S. oralis</i>           | 2.1 | Scaffold | No  |
| 888_SPSE     | JUPG00000000 | <i>S. pseudopneumoniae</i> | <i>S. mitis</i>            | 2.1 | Contig   | No  |
| ATCC BAA-960 | AICS00000000 | <i>S. pseudopneumoniae</i> | <i>S. pseudopneumoniae</i> | 2.1 | Contig   | Yes |
| CCUG 49455   | MWSM00000000 | <i>S. pseudopneumoniae</i> | <i>S. pseudopneumoniae</i> | 2.2 | Scaffold | Yes |
| CCUG 62647   | MUXQ00000000 | <i>S. pseudopneumoniae</i> | <i>S. pseudopneumoniae</i> | 2.1 | Scaffold | Yes |
| CCUG 63747   | MUXR00000000 | <i>S. pseudopneumoniae</i> | <i>S. pseudopneumoniae</i> | 2.2 | Scaffold | Yes |
| G42          | AYRN00000000 | <i>S. pseudopneumoniae</i> | <i>S. pseudopneumoniae</i> | 2.1 | Contig   | Yes |
| IS7493       | NC_015875    | <i>S. pseudopneumoniae</i> | <i>S. pseudopneumoniae</i> | 2.2 | Complete | Yes |
| SK674        | AJKE00000000 | <i>S. pseudopneumoniae</i> | <i>S. pseudopneumoniae</i> | 2.1 | Contig   | Yes |
| 1042_SPSE    | JWFA00000000 | <i>S. mitis</i>            | <i>S. mitis</i>            | 1.9 | Contig   | No  |
| 11/5         | AQTT00000000 | <i>S. mitis</i>            | <i>S. mitis</i>            | 1.9 | Contig   | No  |
| 1111_SMIT    | JWCV00000000 | <i>S. mitis</i>            | <i>S. mitis</i>            | 2.0 | Contig   | Yes |
| 1217_SPSE    | JVYJ00000000 | <i>S. mitis</i>            | <i>S. mitis</i>            | 2.0 | Contig   | No  |
| 13/39        | AQTU00000000 | <i>S. mitis</i>            | <i>S. mitis</i>            | 2.1 | Contig   | No  |
| 168_SPSE     | JVRN00000000 | <i>S. mitis</i>            | <i>S. mitis</i>            | 1.9 | Contig   | Yes |
| 17/34        | ASZZ00000000 | <i>S. mitis</i>            | <i>S. mitis</i>            | 1.9 | Contig   | No  |
| 18/56        | ATAA00000000 | <i>S. mitis</i>            | <i>S. mitis</i>            | 1.9 | Contig   | No  |
| 21/39        | AYRR00000000 | <i>S. mitis</i>            | <i>S. mitis</i>            | 2.0 | Contig   | No  |
| 27/7         | AYRS00000000 | <i>S. mitis</i>            | <i>S. mitis</i>            | 1.9 | Contig   | No  |
| 29/42        | ATAB00000000 | <i>S. mitis</i>            | <i>S. mitis</i>            | 1.9 | Contig   | No  |
| 321A         | LBMT00000000 | <i>S. mitis</i>            | <i>S. mitis</i>            | 2.1 | Scaffold | Yes |
| 38_SPSE      | JVJJ00000000 | <i>S. mitis</i>            | <i>S. mitis</i>            | 1.9 | Contig   | Yes |
| 850_SMIT     | JUQO00000000 | <i>S. mitis</i>            | <i>S. mitis</i>            | 2.1 | Contig   | No  |
| ATCC 6249    | AEEN00000000 | <i>S. mitis</i>            | <i>S. oralis</i>           | 1.9 | Scaffold | No  |
| B_009152_10  | NCVN00000000 | <i>S. mitis</i>            | <i>S. mitis</i>            | 2.0 | Contig   | No  |
| B_5756_13    | NCVM00000000 | <i>S. mitis</i>            | <i>S. mitis</i>            | 1.9 | Scaffold | Yes |
| B6           | NC_013853    | <i>S. mitis</i>            | <i>S. mitis</i>            | 2.1 | Complete | Yes |
| CCUG 31611   | MUYN00000000 | <i>S. mitis</i>            | <i>S. mitis</i>            | 1.8 | Scaffold | Yes |
| CCUG 61082   | MUXS00000000 | <i>S. mitis</i>            | <i>S. mitis</i>            | 2.0 | Scaffold | Yes |

|              |              |                 |                                          |     |          |     |
|--------------|--------------|-----------------|------------------------------------------|-----|----------|-----|
| CCUG 63687   | MUYO00000000 | <i>S. mitis</i> | <i>S. mitis</i>                          | 2.0 | Scaffold | Yes |
| CMW7705B     | LRQR00000000 | <i>S. mitis</i> | <i>S. mitis</i>                          | 1.9 | Scaffold | No  |
| DD22         | CM003839     | <i>S. mitis</i> | <i>S. mitis</i>                          | 2.2 | Scaffold | No  |
| DD26         | LQOD00000000 | <i>S. mitis</i> | <i>S. mitis</i>                          | 2.1 | Scaffold | No  |
| DD28         | KQ970261     | <i>S. mitis</i> | <i>S. mitis</i>                          | 2.2 | Scaffold | Yes |
| F0392        | AFUO00000000 | <i>S. mitis</i> | <i>S. oralis</i> subsp. <i>dentisani</i> | 1.9 | Contig   | No  |
| KCOM 1350    | CP012646     | <i>S. mitis</i> | <i>S. mitis</i>                          | 1.9 | Complete | Yes |
| M3-1         | LROU00000000 | <i>S. mitis</i> | <i>S. mitis</i>                          | 2.0 | Contig   | No  |
| M3-4         | ACRL00000000 | <i>S. mitis</i> | <i>S. mitis</i>                          | 2.0 | Contig   | No  |
| NCTC 10712   | JYGN00000000 | <i>S. mitis</i> | <i>S. mitis</i>                          | 1.8 | Contig   | No  |
| NCTC 12261   | AEDX00000000 | <i>S. mitis</i> | <i>S. mitis</i>                          | 1.8 | Contig   | Yes |
| OD_310347_11 | NCVL00000000 | <i>S. mitis</i> | <i>S. mitis</i>                          | 2.0 | Scaffold | No  |
| OD_317805_11 | NCVK00000000 | <i>S. mitis</i> | <i>S. mitis</i>                          | 2.1 | Scaffold | No  |
| OT25         | JYGP00000000 | <i>S. mitis</i> | <i>S. mitis</i>                          | 1.9 | Contig   | Yes |
| RH_12363_08  | NCVJ00000000 | <i>S. mitis</i> | <i>S. mitis</i>                          | 2.0 | Scaffold | Yes |
| RH_17024_08  | NCVI00000000 | <i>S. mitis</i> | <i>S. mitis</i>                          | 1.8 | Contig   | Yes |
| RH_17439_08  | NCVH00000000 | <i>S. mitis</i> | <i>S. mitis</i>                          | 1.9 | Scaffold | Yes |
| RH_43861_09  | NCVG00000000 | <i>S. mitis</i> | <i>S. mitis</i>                          | 1.8 | Scaffold | Yes |
| RH_50275_09  | NCVF00000000 | <i>S. mitis</i> | <i>S. mitis</i>                          | 2.1 | Scaffold | Yes |
| RH_50738_11  | NCVE00000000 | <i>S. mitis</i> | <i>S. mitis</i>                          | 2.0 | Contig   | Yes |
| RH_777_07    | NCVD00000000 | <i>S. mitis</i> | <i>S. mitis</i>                          | 2.1 | Scaffold | No  |
| RH_8961_10   | NCVC00000000 | <i>S. mitis</i> | <i>S. mitis</i>                          | 1.9 | Scaffold | Yes |
| SK1073       | AFQT00000000 | <i>S. mitis</i> | <i>S. mitis</i>                          | 2.1 | Contig   | No  |
| SK1080       | AFQV00000000 | <i>S. mitis</i> | <i>S. mitis</i>                          | 1.9 | Contig   | Yes |
| SK1126       | JPFT00000000 | <i>S. mitis</i> | <i>S. mitis</i>                          | 1.9 | Contig   | Yes |
| SK137        | JPFS00000000 | <i>S. mitis</i> | <i>S. mitis</i>                          | 2.0 | Contig   | Yes |
| SK137        | JPFS00000000 | <i>S. mitis</i> | <i>S. mitis</i>                          | 2.0 | Contig   | No  |
| SK145        | JYGS00000000 | <i>S. mitis</i> | <i>S. mitis</i>                          | 2.0 | Contig   | Yes |
| SK271        | JPGW00000000 | <i>S. mitis</i> | <i>S. mitis</i>                          | 1.9 | Contig   | Yes |
| SK321        | AEDT00000000 | <i>S. mitis</i> | <i>S. mitis</i>                          | 1.9 | Contig   | Yes |
| SK564        | AEDU00000000 | <i>S. mitis</i> | <i>S. mitis</i>                          | 2.0 | Contig   | Yes |
| SK569        | AFUF00000000 | <i>S. mitis</i> | <i>S. mitis</i>                          | 2.0 | Contig   | No  |
| SK575        | AICU00000000 | <i>S. mitis</i> | <i>S. mitis</i>                          | 2.0 | Contig   | No  |
| SK578        | JPFY00000000 | <i>S. mitis</i> | <i>S. mitis</i>                          | 2.1 | Contig   | Yes |
| SK579        | AJL00000000  | <i>S. mitis</i> | <i>S. mitis</i>                          | 2.0 | Contig   | No  |
| SK597        | AEDV00000000 | <i>S. mitis</i> | <i>S. mitis</i>                          | 2.0 | Contig   | No  |
| SK608        | JPFZ00000000 | <i>S. mitis</i> | <i>S. mitis</i>                          | 2.1 | Contig   | Yes |
| SK616        | AICR00000000 | <i>S. mitis</i> | <i>S. mitis</i>                          | 2.0 | Contig   | No  |
| SK629        | JPFU00000000 | <i>S. mitis</i> | <i>S. mitis</i>                          | 2.2 | Contig   | Yes |
| SK637        | JPFX00000000 | <i>S. mitis</i> | <i>S. mitis</i>                          | 1.9 | Contig   | Yes |
| SK642        | JPFW00000000 | <i>S. mitis</i> | <i>S. mitis</i>                          | 2.0 | Contig   | Yes |
| SK667        | JPFV00000000 | <i>S. mitis</i> | <i>S. mitis</i>                          | 2.1 | Contig   | Yes |
| SK95         | AFUB00000000 | <i>S. mitis</i> | <i>S. oralis</i> subsp. <i>dentisani</i> | 2.0 | Contig   | No  |
| SPAR10       | ALCH00000000 | <i>S. mitis</i> | <i>S. infantis</i>                       | 1.8 | Contig   | No  |
| SVGS_061     | CP014326     | <i>S. mitis</i> | <i>S. mitis</i>                          | 2.2 | Complete | Yes |
