# Supplementary material for: A Pangenome Approach for Discerning Species-Unique Gene Markers for Identifications of Streptococcus pneumoniae and Streptococcus pseudopneumoniae
Source: PubMed Central journal article supplement (PMC7248185; doi:10.3389/fcimb.2020.00222), 2020-05-19
Supplement: Table_2.pdf [file Table_2.pdf]

**Supplementary Table S2.** List of genome sequences of *S. pneumoniae* (n=42) and *S. pseudopneumoniae* (n=29) available in GenBank by November 22, 2019 that were not included in the pangenome analysis.

| Strain                               | Accession number | GenBank species designation | Cluster analysis ANIb | Size (Mb) | Level    |
|--------------------------------------|------------------|-----------------------------|-----------------------|-----------|----------|
| 335                                  | CP026670         | <i>S. pneumoniae</i>        | <i>S. pneumoniae</i>  | 2.2       | Complete |
| 521                                  | CP036529         | <i>S. pneumoniae</i>        | <i>S. pneumoniae</i>  | 2.0       | Complete |
| 947                                  | LR129841         | <i>S. pneumoniae</i>        | <i>S. pneumoniae</i>  | 2.1       | Complete |
| 4496                                 | LR129840         | <i>S. pneumoniae</i>        | <i>S. pneumoniae</i>  | 2.2       | Complete |
| 4559                                 | LR595848         | <i>S. pneumoniae</i>        | <i>S. pneumoniae</i>  | 2.2       | Complete |
| 11A                                  | CP018838         | <i>S. pneumoniae</i>        | <i>S. pneumoniae</i>  | 2.1       | Complete |
| 180-15                               | LR129844         | <i>S. pneumoniae</i>        | <i>S. pneumoniae</i>  | 2.0       | Complete |
| 180-2                                | LR129843         | <i>S. pneumoniae</i>        | <i>S. pneumoniae</i>  | 2.0       | Complete |
| 19F                                  | CP025076         | <i>S. pneumoniae</i>        | <i>S. pneumoniae</i>  | 2.1       | Complete |
| 2245STDY5699475                      | LR536831         | <i>S. pneumoniae</i>        | <i>S. pneumoniae</i>  | 2.1       | Complete |
| 2245STDY6106635                      | LR536837         | <i>S. pneumoniae</i>        | <i>S. pneumoniae</i>  | 2.2       | Complete |
| 2245STDY6178787                      | LR216060         | <i>S. pneumoniae</i>        | <i>S. pneumoniae</i>  | 2.2       | Complete |
| 4041STDY6583227                      | LS483450         | <i>S. pneumoniae</i>        | <i>S. pneumoniae</i>  | 2.2       | Complete |
| 4041STDY6836166                      | LS483451         | <i>S. pneumoniae</i>        | <i>S. pneumoniae</i>  | 2.2       | Complete |
| 4041STDY6836167                      | LS483448         | <i>S. pneumoniae</i>        | <i>S. pneumoniae</i>  | 2.1       | Complete |
| 4041STDY6836169                      | LS483523         | <i>S. pneumoniae</i>        | <i>S. pneumoniae</i>  | 2.1       | Complete |
| 4041STDY6836170                      | LS483449         | <i>S. pneumoniae</i>        | <i>S. pneumoniae</i>  | 2.1       | Complete |
| 55896440-41bd-11e5-998e-3c4a9275d6c6 | LR216065         | <i>S. pneumoniae</i>        | <i>S. pneumoniae</i>  | 2.1       | Complete |
| 569492b0-41bd-11e5-998e-3c4a9275d6c6 | LR216064         | <i>S. pneumoniae</i>        | <i>S. pneumoniae</i>  | 2.1       | Complete |
| ASP0581                              | AP019192         | <i>S. pneumoniae</i>        | <i>S. pneumoniae</i>  | 2.2       | Complete |
| ATCC 49619                           | AP018938         | <i>S. pneumoniae</i>        | <i>S. pneumoniae</i>  | 2.1       | Complete |
| AUSMDU00010538                       | CP045931         | <i>S. pneumoniae</i>        | <i>S. pneumoniae</i>  | 2.1       | Complete |
| b04a6400-1f66-11e7-b93e-3c4a9275d6c8 | LR536843         | <i>S. pneumoniae</i>        | <i>S. pneumoniae</i>  | 2.1       | Complete |
| D39V                                 | CP027540         | <i>S. pneumoniae</i>        | <i>S. pneumoniae</i>  | 2.0       | Complete |
| EF3030                               | CP035897         | <i>S. pneumoniae</i>        | <i>S. pneumoniae</i>  | 2.1       | Complete |
| GPS_US_PATH396-sc-2296505            | LR216050         | <i>S. pneumoniae</i>        | <i>S. pneumoniae</i>  | 2.1       | Complete |
| HKU1-14                              | CP019299         | <i>S. pneumoniae</i>        | <i>S. pneumoniae</i>  | 2.0       | Complete |
| HU-OH                                | AP018937         | <i>S. pneumoniae</i>        | <i>S. pneumoniae</i>  | 2.1       | Complete |
| KK0981                               | AP017971         | <i>S. pneumoniae</i>        | <i>S. pneumoniae</i>  | 2.1       | Complete |
| M16808                               | CP031245         | <i>S. pneumoniae</i>        | <i>S. pneumoniae</i>  | 2.1       | Complete |
| M23734                               | CP031247         | <i>S. pneumoniae</i>        | <i>S. pneumoniae</i>  | 2.1       | Complete |
| M26365                               | CP031248         | <i>S. pneumoniae</i>        | <i>S. pneumoniae</i>  | 2.2       | Complete |
| M26368                               | CP031246         | <i>S. pneumoniae</i>        | <i>S. pneumoniae</i>  | 2.1       | Complete |
| MDRSPN001                            | AP018391         | <i>S. pneumoniae</i>        | <i>S. pneumoniae</i>  | 2.0       | Complete |
| NCTC11902                            | LS483417         | <i>S. pneumoniae</i>        | <i>S. pneumoniae</i>  | 2.1       | Complete |
| NCTC12977                            | LR134294         | <i>S. pneumoniae</i>        | <i>S. pneumoniae</i>  | 2.1       | Complete |
| NCTC13276                            | LS483390         | <i>S. pneumoniae</i>        | <i>S. pneumoniae</i>  | 2.0       | Complete |
| NCTC7465                             | LN831051         | <i>S. pneumoniae</i>        | <i>S. pneumoniae</i>  | 2.1       | Complete |
| NU83127                              | AP018936         | <i>S. pneumoniae</i>        | <i>S. pneumoniae</i>  | 2.2       | Complete |
| R6CIB17                              | CP038808         | <i>S. pneumoniae</i>        | <i>S. pneumoniae</i>  | 2.0       | Complete |
| SPN XDR SMC1710-32                   | CP025838         | <i>S. pneumoniae</i>        | <i>S. pneumoniae</i>  | 2.1       | Complete |

|           |              |                            |                            |     |          |
|-----------|--------------|----------------------------|----------------------------|-----|----------|
| Xen35     | CP025256     | <i>S. pneumoniae</i>       | <i>S. pneumoniae</i>       | 2.2 | Complete |
| 5305      | PDEO00000000 | <i>S. pseudopneumoniae</i> | <i>S. pseudopneumoniae</i> | 2.2 | Contig   |
| BHN868    | SOQU00000000 | <i>S. pseudopneumoniae</i> | <i>S. pseudopneumoniae</i> | 2.2 | Contig   |
| BHN871    | SOQT00000000 | <i>S. pseudopneumoniae</i> | <i>S. pseudopneumoniae</i> | 2.2 | Contig   |
| BHN877    | SOQS00000000 | <i>S. pseudopneumoniae</i> | <i>S. pseudopneumoniae</i> | 2.3 | Contig   |
| BHN879    | SOQV00000000 | <i>S. pseudopneumoniae</i> | <i>S. pseudopneumoniae</i> | 2.2 | Contig   |
| BHN880    | SOQR00000000 | <i>S. pseudopneumoniae</i> | <i>S. pseudopneumoniae</i> | 2.3 | Contig   |
| BHN881    | SOQQ00000000 | <i>S. pseudopneumoniae</i> | <i>S. pseudopneumoniae</i> | 2.2 | Scaffold |
| BHN885    | SOQP00000000 | <i>S. pseudopneumoniae</i> | <i>S. pseudopneumoniae</i> | 2.2 | Scaffold |
| BHN886    | SOQO00000000 | <i>S. pseudopneumoniae</i> | <i>S. pseudopneumoniae</i> | 2.2 | Scaffold |
| BHN890    | SOQN00000000 | <i>S. pseudopneumoniae</i> | <i>S. pseudopneumoniae</i> | 2.4 | Contig   |
| BHN891    | SOQM00000000 | <i>S. pseudopneumoniae</i> | <i>S. pseudopneumoniae</i> | 2.2 | Contig   |
| BHN892    | SOQL00000000 | <i>S. pseudopneumoniae</i> | <i>S. pseudopneumoniae</i> | 2.2 | Scaffold |
| BHN893    | SOQK00000000 | <i>S. pseudopneumoniae</i> | <i>S. pseudopneumoniae</i> | 2.2 | Scaffold |
| BHN912    | SOQJ00000000 | <i>S. pseudopneumoniae</i> | <i>S. pseudopneumoniae</i> | 2.2 | Scaffold |
| BHN913    | SOQI00000000 | <i>S. pseudopneumoniae</i> | <i>S. pseudopneumoniae</i> | 2.2 | Contig   |
| BHN914    | SOQH00000000 | <i>S. pseudopneumoniae</i> | <i>S. pseudopneumoniae</i> | 2.2 | Scaffold |
| BHN915    | SOQG00000000 | <i>S. pseudopneumoniae</i> | <i>S. pseudopneumoniae</i> | 2.2 | Scaffold |
| BHN916    | SOQF00000000 | <i>S. pseudopneumoniae</i> | <i>S. pseudopneumoniae</i> | 2.3 | Scaffold |
| BHN918    | SOQE00000000 | <i>S. pseudopneumoniae</i> | <i>S. pseudopneumoniae</i> | 2.2 | Contig   |
| BHN919    | SOQD00000000 | <i>S. pseudopneumoniae</i> | <i>S. pseudopneumoniae</i> | 2.2 | Contig   |
| BHN920    | SOQC00000000 | <i>S. pseudopneumoniae</i> | <i>S. pseudopneumoniae</i> | 2.2 | Contig   |
| BHN922    | SOQB00000000 | <i>S. pseudopneumoniae</i> | <i>S. pseudopneumoniae</i> | 2.2 | Contig   |
| CipR71    | PDEN00000000 | <i>S. pseudopneumoniae</i> | <i>S. pseudopneumoniae</i> | 2.1 | Contig   |
| EL2652N1  | PTTL00000000 | <i>S. pseudopneumoniae</i> | <i>S. pseudopneumoniae</i> | 2.2 | Contig   |
| NTPn 138  | LTCN00000000 | <i>S. pseudopneumoniae</i> | <i>S. pseudopneumoniae</i> | 2.1 | Scaffold |
| Spain2270 | RAHZ00000000 | <i>S. pseudopneumoniae</i> | <i>S. pseudopneumoniae</i> | 2.2 | Contig   |
| Spain3473 | PTTJ00000000 | <i>S. pseudopneumoniae</i> | <i>S. pseudopneumoniae</i> | 2.2 | Contig   |
| Spain939  | PTQV00000000 | <i>S. pseudopneumoniae</i> | <i>S. pseudopneumoniae</i> | 2.4 | Contig   |
| Spain9880 | PTTK00000000 | <i>S. pseudopneumoniae</i> | <i>S. pseudopneumoniae</i> | 2.2 | Contig   |
