# Supplementary material for: A Pangenome Approach for Discerning Species-Unique Gene Markers for Identifications of Streptococcus pneumoniae and Streptococcus pseudopneumoniae
Source: PubMed Central journal article supplement (PMC7248185; doi:10.3389/fcimb.2020.00222), 2020-05-19
Supplement: Table_3.pdf [file Table_3.pdf]

**Supplementary Table S3.** Genomic information of genome sequences of *S. pseudopneumoniae* performed in the study.

| Strain     | ANIb (%) <sup>a</sup> | Accession Number | No. scaffolds (> 500 bp) | N50    | Total length (bp) | Coverage | CDSs (total) | N's | GC (%) | Isolation source        | Geographic origin  |
|------------|-----------------------|------------------|--------------------------|--------|-------------------|----------|--------------|-----|--------|-------------------------|--------------------|
| CCUG 47366 | 98.6                  | RXXW00000000     | 74                       | 70,251 | 2,152,464         | 784      | 2,270        | 386 | 39.9   | Missing                 | Sweden:Växjö       |
| CCUG 50868 | 97.3                  | RXXV00000000     | 84                       | 62,624 | 2,211,663         | 821      | 2,329        | 146 | 39.7   | Human respiratory tract | Missing            |
| CCUG 50871 | 98.8                  | RXXU00000000     | 77                       | 53,660 | 2,112,424         | 611      | 2,212        | 20  | 39.9   | Human respiratory tract | Missing            |
| CCUG 61551 | 98.2                  | RXXT00000000     | 79                       | 55,725 | 2,137,952         | 607      | 2,245        | 56  | 39.9   | Human sputum            | Sweden: Karlstad   |
| CCUG 63793 | 97.5                  | RXXS00000000     | 84                       | 53,172 | 2,248,710         | 1,196    | 2,360        | 34  | 39.7   | Human sputum            | Sweden:Gothenburg  |
| CCUG 64062 | 96.8                  | RXXR00000000     | 55                       | 82,262 | 2,165,344         | 845      | 2,281        | 245 | 39.9   | Human sputum            | Sweden:Kalmar      |
| CCUG 70988 | 97.7                  | RXXQ00000000     | 95                       | 48,502 | 2,175,673         | 995      | 2,290        | 67  | 39.9   | Human sputum            | Sweden:Gothenburg  |
| CCUG 71653 | 98.5                  | RXXP00000000     | 83                       | 56,738 | 2,195,012         | 785      | 2,312        | 200 | 39.8   | Human sputum            | Sweden:Gothenburg  |
| CCUG 71996 | 98.5                  | RXXN00000000     | 83                       | 54,340 | 2,169,308         | 253      | 2,298        | 92  | 39.8   | Human sputum            | Sweden:Trollhättan |
| CCUG 72018 | 97.2                  | RXXM00000000     | 78                       | 47,531 | 2,128,633         | 1,020    | 2,228        | 125 | 39.9   | Human sputum            | Sweden:Gothenburg  |
| CCUG 72019 | 98.5                  | RXXL00000000     | 79                       | 49,224 | 2,119,718         | 828      | 2,221        | 226 | 39.9   | Human sputum            | Sweden:Gothenburg  |
| CCUG 72028 | 96.9                  | RXXK00000000     | 61                       | 85,433 | 2,171,385         | 960      | 2,262        | 63  | 39.8   | Human sputum            | Sweden:Gothenburg  |
| CCUG 72029 | 97.0                  | RXXJ00000000     | 70                       | 90,733 | 2,189,998         | 1,063    | 2,301        | 342 | 39.7   | Human sputum            | Sweden:Gothenburg  |
| CCUG 72040 | 96.9                  | RXXI00000000     | 76                       | 64,040 | 2,175,171         | 956      | 2,267        | 307 | 39.8   | Human sputum            | Sweden: Borås      |

<sup>a</sup>ANIb similarity values were calculated bidirectionally against the genome sequence of *S. pseudopneumoniae* CCUG 49455<sup>T</sup> (NZ\_LAICS00000000). Whole genome sequences were determined using an Illumina MiSeq platform (Eurofins Genomics, Konstanz, Germany)
