# Supplementary material for: A Pangenome Approach for Discerning Species-Unique Gene Markers for Identifications of Streptococcus pneumoniae and Streptococcus pseudopneumoniae
Source: PubMed Central journal article supplement (PMC7248185; doi:10.3389/fcimb.2020.00222), 2020-05-19
Supplement: Table_4.pdf [file Table_4.pdf]

**Supplementary Table S4.** Pangenome gene distribution between *S. pneumoniae* and *S. pseudopneumoniae*.

| <i>S.pneumoniae</i> – <i>S. pseudopneumoniae</i> genomes (n=45) |                      |                      |
|-----------------------------------------------------------------|----------------------|----------------------|
|                                                                 | Gene clusters<br>(n) | Gene clusters<br>(%) |
| Core                                                            | 887                  | 16.7                 |
| Soft-core                                                       | 1,302                | 24.5                 |
| Cloud                                                           | 2,463                | 46.4                 |
| Shell                                                           | 1,542                | 29.1                 |
| Pangenome                                                       | 5,307                | 100                  |
