# Supplementary material for: A Pangenome Approach for Discerning Species-Unique Gene Markers for Identifications of Streptococcus pneumoniae and Streptococcus pseudopneumoniae
Source: PubMed Central journal article supplement (PMC7248185; doi:10.3389/fcimb.2020.00222), 2020-05-19
Supplement: Table_5.pdf [file Table_5.pdf]

**Supplementary Table S5.** BLASTN analysis of the gene markers for *S. pneumoniae* and *S. pseudopneumoniae* against additional genome sequences available in GenBank by November 2019, as well as genome sequences of 20 *S. pneumoniae* and 14 *S. pseudopneumoniae* clinical strains that were not included in the pangenome analysis. The numbers indicate number of BLASTN hits of the gene markers against a set of genome sequences.

| Gene marker | <i>S. pneumoniae</i> |                               | <i>S. pseudopneumoniae</i> |                               |
|-------------|----------------------|-------------------------------|----------------------------|-------------------------------|
|             | NCBI genomes         | Clinical strains <sup>a</sup> | NCBI genomes               | Clinical strains <sup>b</sup> |
|             | n=42                 | n=20                          | n=29                       | n=14                          |
| Pneumo_127  | 41                   | 20                            | 0                          | 0                             |
| Pneumo_436  | 42                   | 20                            | 0                          | 0                             |
| Pneumo_1011 | 40                   | 20                            | 2                          | 0                             |
| Pneumo_1012 | 40                   | 20                            | 2                          | 0                             |
| Pneumo_1013 | 40                   | 20                            | 2                          | 0                             |
| Pneumo_1014 | 40                   | 20                            | 2                          | 0                             |
| Pneumo_1361 | 42                   | 20                            | 0                          | 0                             |
| Pneumo_1362 | 42                   | 20                            | 0                          | 0                             |
| Pneumo_1961 | 41                   | 20                            | 1                          | 0                             |
| Pneumo_1964 | 42                   | 20                            | 1                          | 0                             |
| Pseudo_228  | 0                    | 0                             | 29                         | 14                            |
| Pseudo_231  | 0                    | 0                             | 29                         | 14                            |
| Pseudo_232  | 0                    | 0                             | 29                         | 14                            |
| Pseudo_641  | 0                    | 0                             | 29                         | 14                            |
| Pseudo_764  | 0                    | 0                             | 37                         | 14                            |
| Pseudo_899  | 0                    | 0                             | 29                         | 14                            |
| Pseudo_901  | 0                    | 0                             | 29                         | 14                            |
| Pseudo_902  | 0                    | 0                             | 29                         | 14                            |
| Pseudo_1933 | 0                    | 0                             | 26                         | 14                            |

<sup>a</sup>Salvà-Serra *et al.* 2017.

<sup>b</sup>This study.
