# Supplementary material for: A Pangenome Approach for Discerning Species-Unique Gene Markers for Identifications of Streptococcus pneumoniae and Streptococcus pseudopneumoniae
Source: PubMed Central journal article supplement (PMC7248185; doi:10.3389/fcimb.2020.00222), 2020-05-19
Supplement: Table_6.pdf [file Table_6.pdf]

**Supplementary Table S6.** List of *S. pneumoniae* and *S. pseudopneumoniae* unique gene markers and species-specific peptide matches detected by LC-MS/MS analysis.

| <b>Species</b>             | <b>Unique Gene</b> | <b>Peptide matches</b> |
|----------------------------|--------------------|------------------------|
| <i>S. pneumoniae</i>       | Pneumo_127         | No hit                 |
|                            | Pneumo_436         | No hit                 |
|                            | Pneumo_1011        | 4                      |
|                            | Pneumo_1012        | No hit                 |
|                            | Pneumo_1013        | No hit                 |
|                            | Pneumo_1014        | 1                      |
|                            | Pneumo_1361        | 1                      |
|                            | Pneumo_1362        | No hit                 |
|                            | Pneumo_1961        | 1                      |
|                            | Pneumo_1964        | 1                      |
| <i>S. pseudopneumoniae</i> | Pseudo_228         | 2                      |
|                            | Pseudo_231         | No hit                 |
|                            | Pseudo_232         | 1                      |
|                            | Pseudo_641         | No hit                 |
|                            | Pseudo_899         | No hit                 |
|                            | Pseudo_901         | No hit                 |
|                            | Pseudo_902         | No hit                 |
|                            | Pseudo_1764        | No hit                 |
|                            | Pseudo_1933        | 1                      |
